# Supplementary material
Source: PubMed Central journal article supplement (PMC4160092)
Supplement: JCI76503sd1.pdf [file JCI76503sd1.pdf]

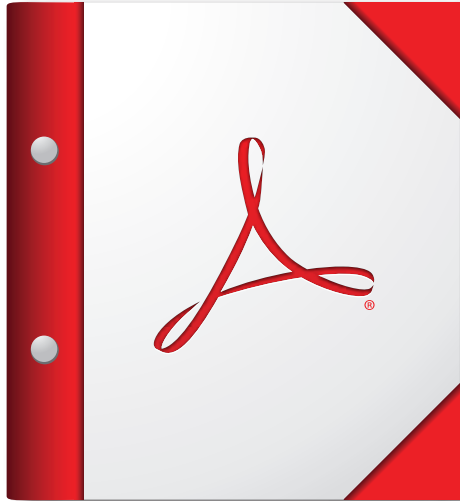

**For the best experience, open this PDF portfolio in  
Acrobat X or Adobe Reader X, or later.**

[Get Adobe Reader Now!](#)
